# Supplementary material
Source: PubMed Central journal article supplement (PMC3535593)
Supplement: 1211659110_pnas.201211659SI.pdf [file 1211659110_pnas.201211659SI.pdf]

# Supporting Information

Rodriguez-Diaz et al. 10.1073/pnas.1211659110

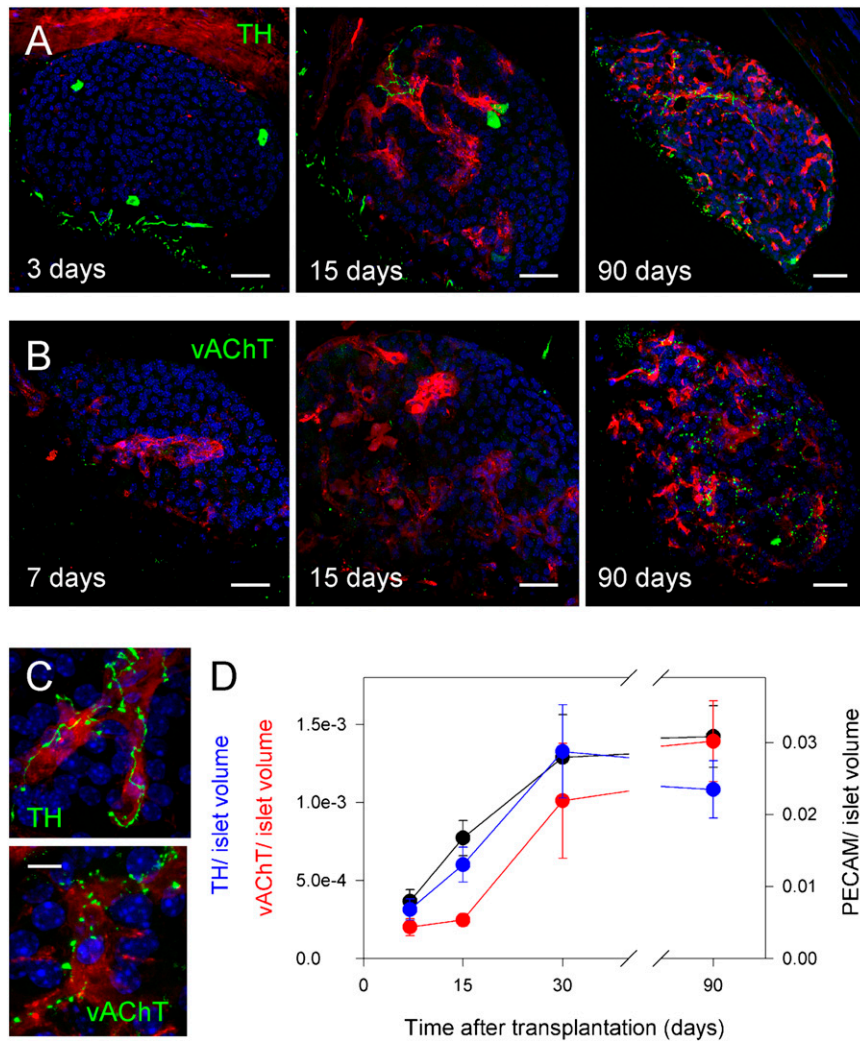

**Fig. S1.** Time course of reinnervation and revascularization of islets engrafted in the anterior chamber of the mouse eye. (A and B) Z-stacks of confocal images of intraocular islets grafts at different time points after transplantation show new blood vessel formation [platelet endothelial cell adhesion molecule (PECAM); red] and ingrowth of sympathetic axons (A) [tyrosine hydroxylase (TH); green] and parasympathetic axons (B) [vesicular acetylcholine transporter (vAChT); green]. (C) High-magnification Z-stack of confocal images of TH and vAChT axons (green) reinnervating the islet graft along ingrowing blood vessels (PECAM; red). (Scale bars: A and B, 20  $\mu\text{m}$ ; C, 5  $\mu\text{m}$ .) (D) Quantification of the time course of islet graft TH (blue symbols), vAChT (red symbols), and PECAM (black symbols) immunostaining at 0, 15, 30, and 90 d after transplantation.
